# Supplementary material
Source: MDPI journal article supplement (https://www.mdpi.com/2297-8739/9/4/93)
Supplement: s1 [file s1]

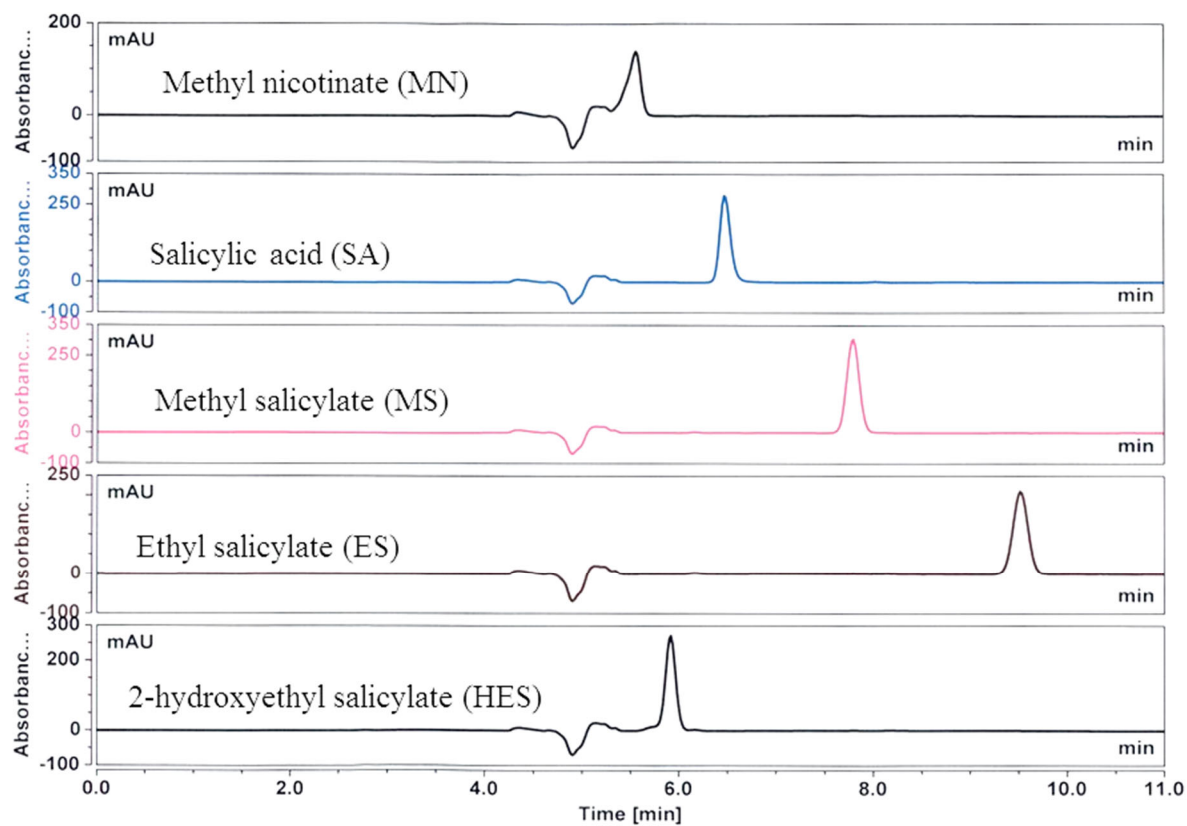

**Figure S1. Chromatogram for MN, HES, SA, MS and ES at optimum conditions**

**(by using methanol as dilution solvent and before use mobile phase as diluent)**
